# Supplementary material
Source: ML conference proceedings conference paper supplement (https://openaccess.thecvf.com/content/CVPR2021/html/Zhang_Prototype_Completion_With_CVPR_2021_paper.html)
Supplement: Supplementary file 1 [file Zhang_Prototype_Completion_With_CVPR_2021_supplemental.pdf]

# Supplementary Material for “Prototype Completion with Primitive Knowledge for Few-Shot Learning”

Baoquan Zhang, Xutao Li\*, Yunming Ye\*, Zhichao Huang, Lisai Zhang  
Harbin Institute of Technology, Shenzhen

zhangbaoquan@stu.hit.edu.cn, {lixutao, yeyunming}@hit.edu.cn,  
iceshzc@stu.hit.edu.cn, LisaiZhang@foxmail.com

## A. Additional Ablation Study

We conduct supplementary ablation studies on the tieredImagenet and CUB-200-2011 datasets, respectively. The results are shown in Table 1 and 2, which also demonstrate the effectiveness of the two specially designed components, *i.e.*, learning to complete prototypes and Gaussian-based prototype fusion strategy (GaussFusion).

Table 1. Ablation study on tieredImagenet.

|       | LCP | GF | MF | 5-way 1-shot  | 5-way 5-shot  |
|-------|-----|----|----|---------------|---------------|
| (i)   |     |    |    | 69.02 ± 0.72% | 79.31 ± 0.18% |
| (ii)  | ✓   |    |    | 71.66 ± 0.92% | 80.78 ± 0.75% |
| (iii) | ✓   |    | ✓  | 74.02 ± 0.89% | 83.29 ± 0.18% |
| (iv)  | ✓   | ✓  |    | 81.04 ± 0.89% | 87.42 ± 0.57% |

Table 2. Ablation study on CUB-200-2011.

|       | LCP | GF | MF | 5-way 1-shot  | 5-way 5-shot  |
|-------|-----|----|----|---------------|---------------|
| (i)   |     |    |    | 77.75 ± 0.82% | 91.36 ± 0.41% |
| (ii)  | ✓   |    |    | 84.36 ± 0.68% | 89.19 ± 0.47% |
| (iii) | ✓   |    | ✓  | 88.87 ± 0.58% | 93.99 ± 0.34% |
| (iv)  | ✓   | ✓  |    | 93.20 ± 0.45% | 94.90 ± 0.31% |

## B. Derivation of GaussFusion

**Proposition.** Let  $f(x)$  and  $g(x)$  be a Multivariate Gaussian Distributions with diagonal covariance, *i.e.*,  $f(x) = N(\hat{\mu}_k, \text{diag}(\hat{\sigma}_k^2))$  and  $g(x) = N(\mu_k, \text{diag}(\sigma_k^2))$  where  $x$  is a  $d$ -dimension random vector,  $\hat{\mu}_k$  and  $\mu_k$  denote  $d$ -dimension mean vector, and  $\hat{\sigma}_k^2$  and  $\sigma_k^2$  are  $d$ -dimension variance vector. Then, their product obeys a new Multivariate Gaussian Distributions  $N(\mu'_k, \text{diag}(\sigma_k'^2))$  with  $\mu'_k = \frac{\sigma_k^2 \odot \hat{\mu}_k + \hat{\sigma}_k^2 \odot \mu_k}{\hat{\sigma}_k^2 + \sigma_k^2}$  and  $\sigma_k'^2 = \frac{\sigma_k^2 \odot \hat{\sigma}_k^2}{\hat{\sigma}_k^2 + \sigma_k^2}$ , where  $\odot$  denotes the element-wise product.

**Derivation.** Considering that the covariances of  $f(x)$  and  $g(x)$  are simplified as diagonal covariances. This means

that the variables of the random vector  $x$  are uncorrelated. In this case,  $f(x)$  and  $g(x)$  can be simplified as the expression below:

$$f(x) = \prod_{i=0}^{d-1} \frac{1}{\sqrt{2\pi\hat{\sigma}_{k,i}^2}} e^{-\frac{(x_i - \hat{\mu}_{k,i})^2}{2\hat{\sigma}_{k,i}^2}}$$

$$g(x) = \prod_{i=0}^{d-1} \frac{1}{\sqrt{2\pi\sigma_{k,i}^2}} e^{-\frac{(x_i - \mu_{k,i})^2}{2\sigma_{k,i}^2}}$$

Thus, their product  $h(x)$  satisfies:

$$\begin{aligned} h(x) &= f(x)g(x) \\ &= \prod_{i=0}^{d-1} \frac{1}{\sqrt{2\pi\hat{\sigma}_{k,i}^2}} e^{-\frac{(x_i - \hat{\mu}_{k,i})^2}{2\hat{\sigma}_{k,i}^2}} \frac{1}{\sqrt{2\pi\sigma_{k,i}^2}} e^{-\frac{(x_i - \mu_{k,i})^2}{2\sigma_{k,i}^2}} \\ &= \prod_{i=0}^{d-1} \frac{1}{2\pi\sqrt{\hat{\sigma}_{k,i}^2\sigma_{k,i}^2}} e^{-\frac{(x_i - \hat{\mu}_{k,i})^2}{2\hat{\sigma}_{k,i}^2} - \frac{(x_i - \mu_{k,i})^2}{2\sigma_{k,i}^2}} \\ &= \prod_{i=0}^{d-1} \frac{1}{2\pi\sqrt{\hat{\sigma}_{k,i}^2\sigma_{k,i}^2}} e^{-\frac{(x_i - \frac{\sigma_{k,i}^2\hat{\mu}_{k,i} + \hat{\sigma}_{k,i}^2\mu_{k,i}}{\hat{\sigma}_{k,i}^2 + \sigma_{k,i}^2})^2}{2\frac{\hat{\sigma}_{k,i}^2\sigma_{k,i}^2}{\hat{\sigma}_{k,i}^2 + \sigma_{k,i}^2}} + \frac{(\hat{\mu}_{k,i} - \mu_{k,i})^2}{2(\hat{\sigma}_{k,i}^2 + \sigma_{k,i}^2)}} \\ &= \prod_{i=0}^{d-1} \frac{S_i}{\sqrt{2\pi\frac{\hat{\sigma}_{k,i}^2\sigma_{k,i}^2}{\hat{\sigma}_{k,i}^2 + \sigma_{k,i}^2}}} e^{-\frac{(x_i - \frac{\sigma_{k,i}^2\hat{\mu}_{k,i} + \hat{\sigma}_{k,i}^2\mu_{k,i}}{\hat{\sigma}_{k,i}^2 + \sigma_{k,i}^2})^2}{2(\frac{\hat{\sigma}_{k,i}^2\sigma_{k,i}^2}{\hat{\sigma}_{k,i}^2 + \sigma_{k,i}^2})}} \end{aligned}$$

where  $S_i = \frac{1}{\sqrt{2\pi(\sigma_{k,i}^2 + \hat{\sigma}_{k,i}^2)}} e^{-\frac{(\hat{\mu}_{k,i} - \mu_{k,i})^2}{2(\hat{\sigma}_{k,i}^2 + \sigma_{k,i}^2)}}$ . Thus,  $h(x)$  is also a multivariate Gaussian distribution, *i.e.*,  $N(\mu'_k, \text{diag}(\sigma_k'^2))$  with mean  $\mu'_k = \frac{\sigma_k^2 \odot \hat{\mu}_k + \hat{\sigma}_k^2 \odot \mu_k}{\hat{\sigma}_k^2 + \sigma_k^2}$  and diagonal covariance  $\text{diag}(\sigma_k'^2)$  where  $\sigma_k'^2 = \frac{\sigma_k^2 \odot \hat{\sigma}_k^2}{\hat{\sigma}_k^2 + \sigma_k^2}$ .

\*Corresponding author
